# Supplementary material for: Bi-doped ruthenium oxide nanocrystal for water oxidation in acidic media
Source: Royal Society of Chemistry journal article supplement (doi:10.1039/d4nr02745k), 2024-01-01
Supplement: d4nr02745k1.pdf [file d4nr02745k1.pdf]

Supplementary Information

**Bi-doped Ruthenium Oxide Nanocrystal for Water Oxidation in Acidic Media**

Shiyao Chen<sup>a</sup>, Hai Liu<sup>a</sup>, Bichen Yuan<sup>a</sup>, Wenhai Xu<sup>a</sup>, Aiqing Cao<sup>a</sup>, Marshet Getaye Sendeku<sup>b</sup>,  
Yaping Li<sup>a,\*</sup>, Xiaoming Sun<sup>a,\*</sup>, Fengmei Wang<sup>a,\*</sup>

---

*a. State Key Laboratory of Chemical Resource Engineering, College of Chemistry, Beijing University of Chemical Technology, Beijing 100029, P. R. China.*

*b. Ocean Hydrogen Energy R&D Center, Research Institute of Tsinghua University in Shenzhen, Shenzhen, P. R. China.*

---

*\*E-mail: wangfm@buct.edu.cn; sunxm@mail.buct.edu.cn; liyp@mail.buct.edu.cn*

## Supplementary Note 1

The Gibbs free energy of adsorbed species ( $G_{*ads}$ ) can be computed using following equation<sup>1</sup>:

$$G_{*ads} = E + ZPE - TS$$

In this equation,  $*ads$  represents the adsorbed species, such as  $*OH$ ,  $*O$ ,  $*OOH$ , or  $*H$ . The term  $G$  represents the Gibbs free energy of the adsorbed species, while  $E$  refers to the energy obtained from Density Functional Theory (DFT) calculation,  $ZPE$  stands for zero-point energy,  $S$  represents entropy and  $T$  denotes the temperature, which was set at 298.15 K for this study.

The oxygen evolution reaction (OER) under acidic conditions, a four-electron transfer process, comprises four distinct reaction steps (Figure 4a, 4b). Both AEM and LOM mechanisms share the common initial stages, which are evaluated using Equations 1 and 2. Subsequently, AEM proceeds with the next two stages, calculated by Equations 3 and 4 (Figure 4a),<sup>2</sup> whereas LOM continues with Equations 5 and 6 (Figure 4b).<sup>3</sup> The Gibbs free energy of ( $H^+ + e^-$ ) at standard conditions is assumed as the free energy of  $1/2 H_2$ .

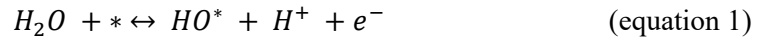

$$\Delta G_1 = \Delta G_{HO^*} + 1/2\Delta G_{H_2} - \Delta G_* - \Delta G_{H_2O} - eU$$

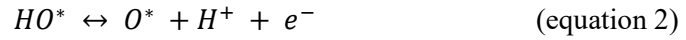

$$\Delta G_2 = \Delta G_{O^*} + 1/2\Delta G_{H_2} - \Delta G_{HO^*} - eU$$

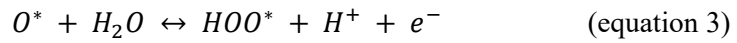

$$\Delta G_3 = \Delta G_{HOO^*} + 1/2\Delta G_{H_2} - \Delta G_{O^*} - \Delta G_{H_2O} - eU$$

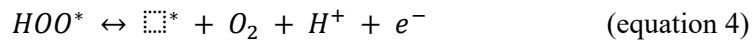

$$\Delta G_4 = \Delta G_* + 1/2\Delta G_{H_2} + \Delta G_{O_2} - \Delta G_{HOO^*} - eU$$

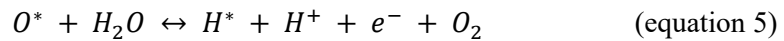

$$\Delta G'_3 = \Delta G_{H^*} + 1/2\Delta G_{H_2} + \Delta G_{O_2} - \Delta G_{O^*} - \Delta G_{H_2O} - eU$$

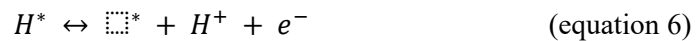

$$\Delta G'_4 = \Delta G_* + 1/2\Delta G_{H_2} - \Delta G_{H^*} - eU$$

In this work,  $\Delta G_{1-4}^{(j)}$  values were calculated at  $U = 0$  V.

## Supplementary Note 2

To clarify the effect of varying loadings on the activity of the  $\text{Bi}_{0.05}\text{Ru}_{0.95}\text{O}_2$  catalyst, the Turnover Frequency (TOF) value was calculated.

$$\text{TOF} = \frac{J * A}{4 * e * n}$$

$J$  is current density obtained at 1.5 V (vs. RHE) and normalized by geometric area;  $A$  is the geometric area;  $e$  is the charge of electron ( $1.602 * 10^{-19}$  C) and  $n$  is the number of active sites, calculated *via* the following equation.

This method is calculating based on all Ru atoms, from the following equation:

$$n = \frac{m_{\text{loading}} * N_A}{M_w} * n_{\text{metal}}$$

where  $m_{\text{loading}}$  is the loading mass of catalyst on carbon paper,  $n_{\text{metal}}$  is the mole number of metal atoms such as Ru per mole of electrocatalysts and  $M_w$  is the molecular weight of catalyst.

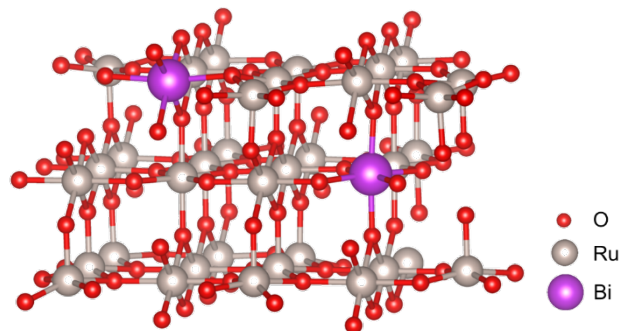

Figure S1 Slab model of  $\text{Bi}_2\text{Ru}_{34}\text{O}_{72}$  after structural optimization.

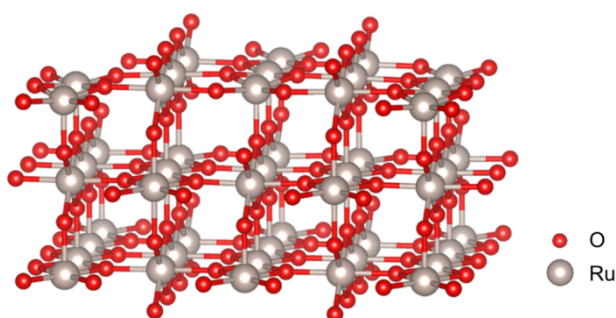

Figure S2 Slab model of  $\text{RuO}_2$  after structural optimization.

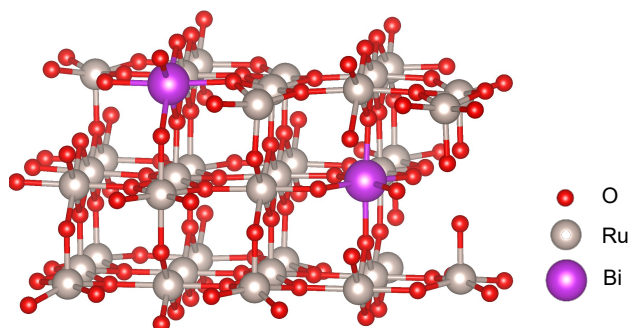

Figure S3 Slab model of  $\text{Bi-O}_v\text{-RuO}_2$  after structural optimization.

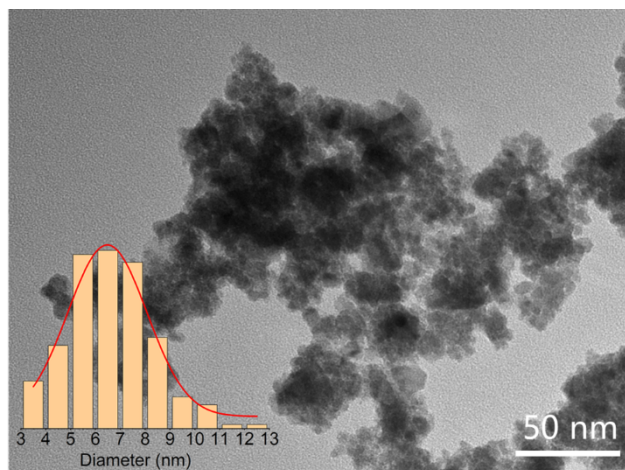

Figure S4 TEM image of  $\text{Bi}_{0.05}\text{Ru}_{0.95}\text{O}_2$ , inset showing particle size distribution.

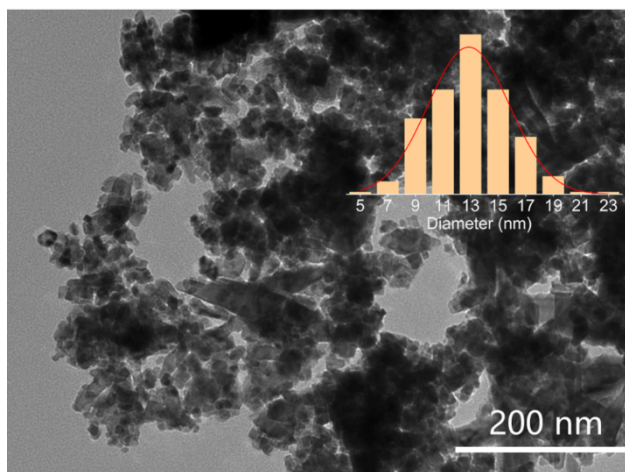

Figure S5 TEM image of HM- $\text{RuO}_2$ , inset showing particle size distribution.

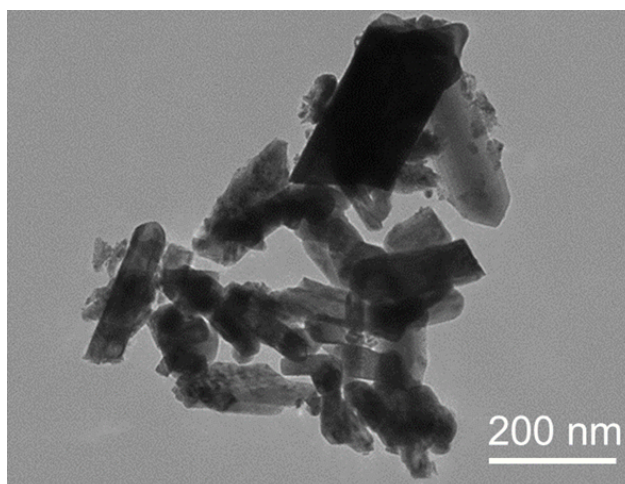

Figure S6 TEM image of C- $\text{RuO}_2$ .

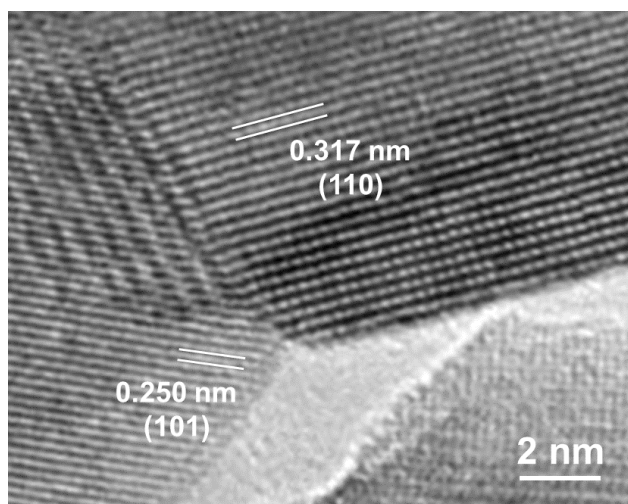

Figure S7 HRTEM image of C-RuO<sub>2</sub>.

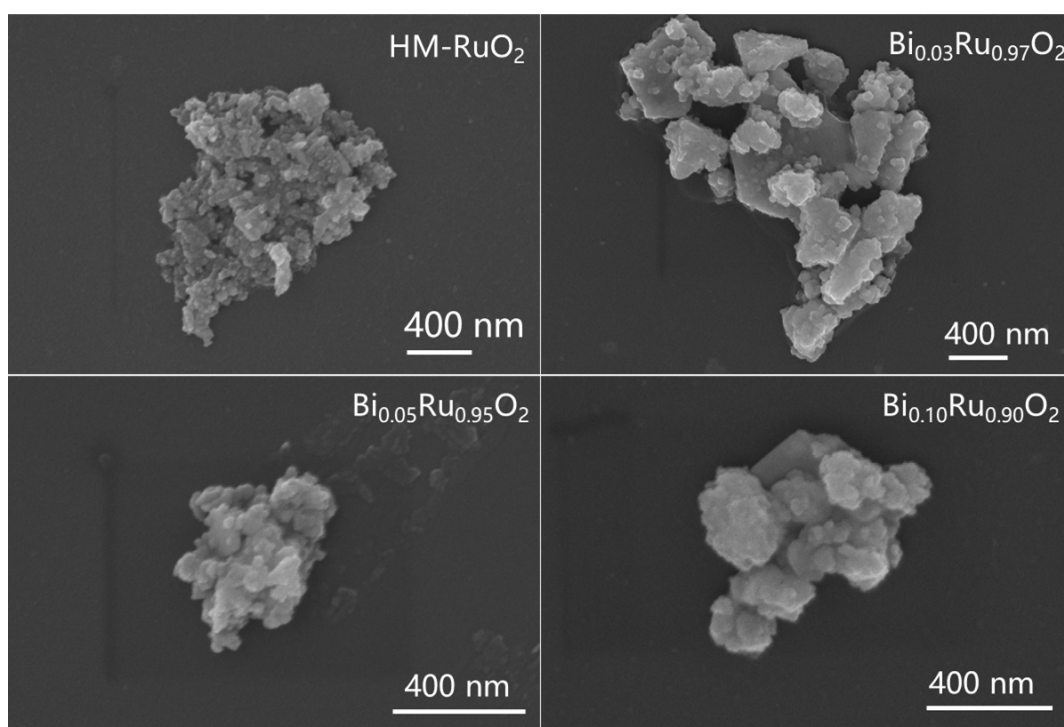

Figure S8 SEM images of HM-RuO<sub>2</sub>, Bi<sub>0.03</sub>Ru<sub>0.97</sub>O<sub>2</sub>, Bi<sub>0.05</sub>Ru<sub>0.95</sub>O<sub>2</sub>, Bi<sub>0.10</sub>Ru<sub>0.90</sub>O<sub>2</sub>.

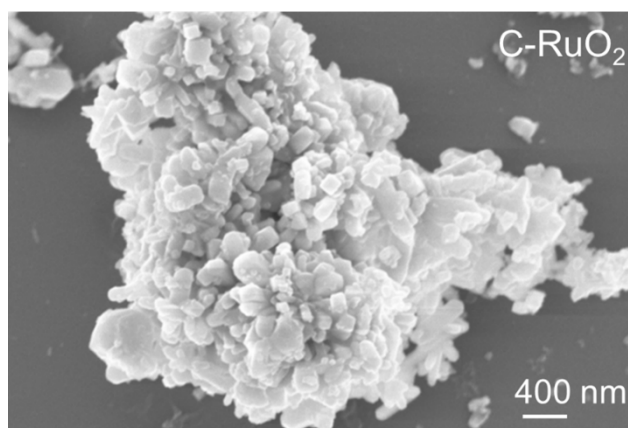

Figure S9 SEM image of C-RuO<sub>2</sub>.

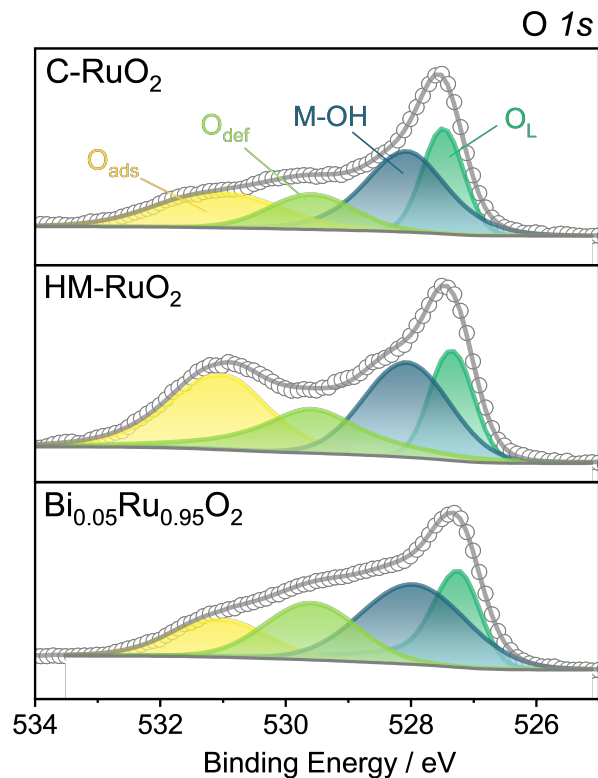

Figure S10 O 1s XPS spectra of Bi<sub>0.05</sub>Ru<sub>0.95</sub>O<sub>2</sub>, HM-RuO<sub>2</sub> and C-RuO<sub>2</sub>. More details are shown in Table S2.

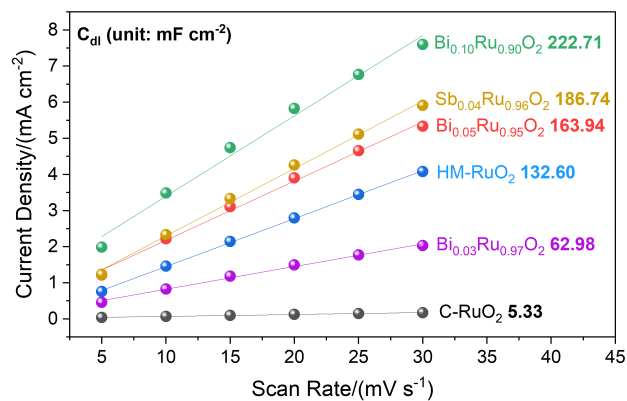

Figure S11 C<sub>dl</sub> linear fitting plot of Bi<sub>x</sub>Ru<sub>1-x</sub>O<sub>2</sub>, Sb<sub>0.04</sub>Ru<sub>0.96</sub>O<sub>2</sub>, HM-RuO<sub>2</sub> and C-RuO<sub>2</sub> derived from CV curves.



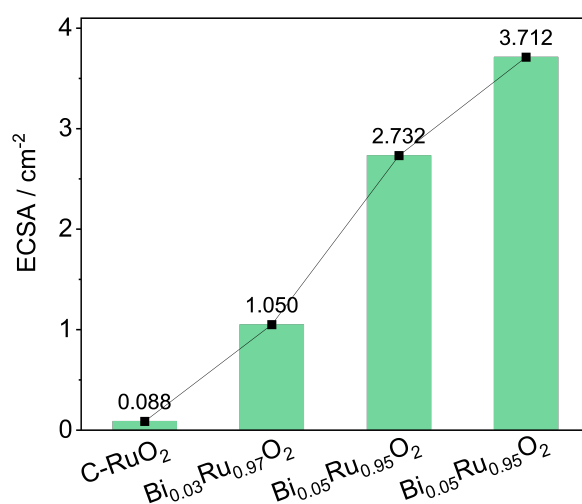

Figure S12 Comparison of electrochemical active surface areas of Bi<sub>x</sub>Ru<sub>1-x</sub>O<sub>2</sub> and C-RuO<sub>2</sub>.

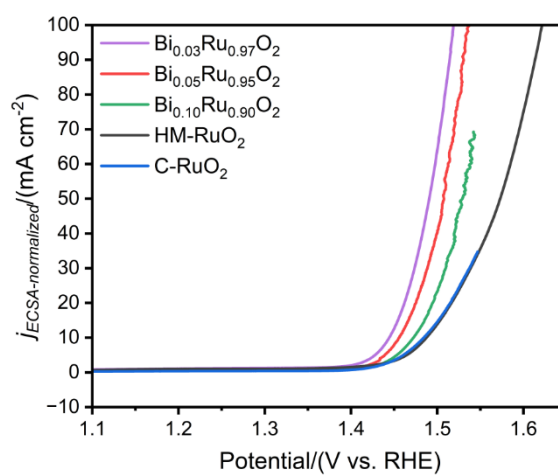

Figure S13 Specific activity curves of Bi<sub>x</sub>Ru<sub>1-x</sub>O<sub>2</sub>, HM-RuO<sub>2</sub> and C-RuO<sub>2</sub> electrode collected at the scan rate of 5 mV s<sup>-1</sup> in 0.5 M H<sub>2</sub>SO<sub>4</sub> electrolyte.

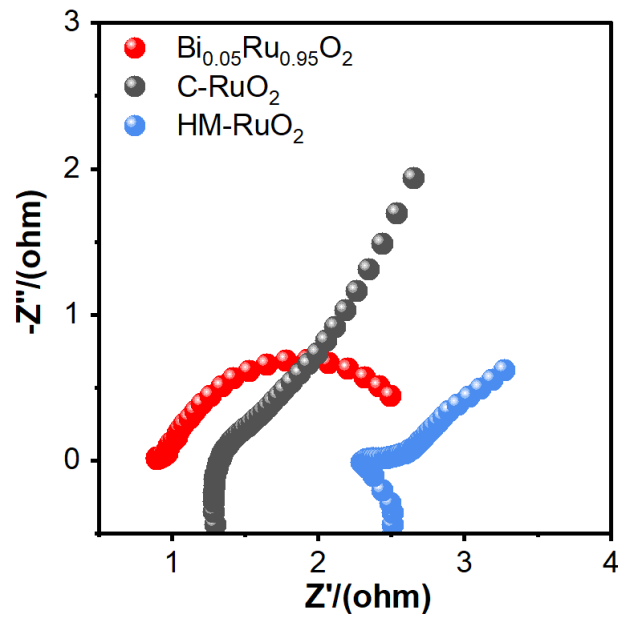

Figure S14 EIS plot of Bi<sub>0.05</sub>Ru<sub>0.95</sub>O<sub>2</sub>, HM-RuO<sub>2</sub> and C-RuO<sub>2</sub> at a voltage (init E) of 1.24 V in 0.5 M H<sub>2</sub>SO<sub>4</sub> electrolyte. The frequency range for testing is from 100 kHz to 1 Hz.

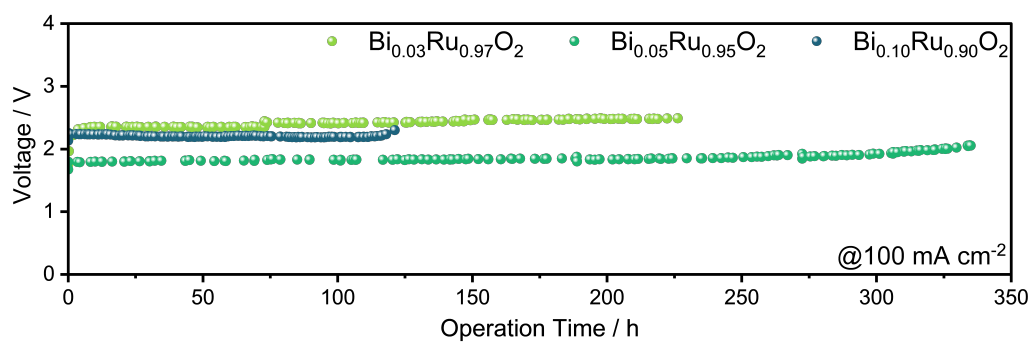

Figure S15 Chronopotentiometry tests of Bi<sub>x</sub>Ru<sub>1-x</sub>O<sub>2</sub> at 100 mA cm<sup>-2</sup> in 0.5 M H<sub>2</sub>SO<sub>4</sub> electrolyte.

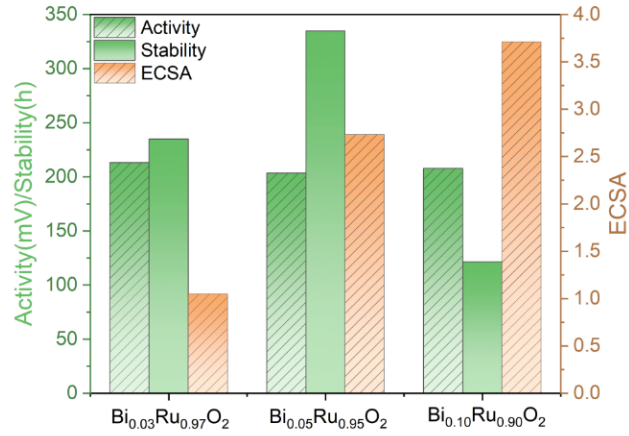

Figure S16 Comparison of activity (overpotential@10 mA cm<sup>-2</sup>) and stability (at 100 mA cm<sup>-2</sup>) among various Bi<sub>x</sub>Ru<sub>1-x</sub>O<sub>2</sub>.

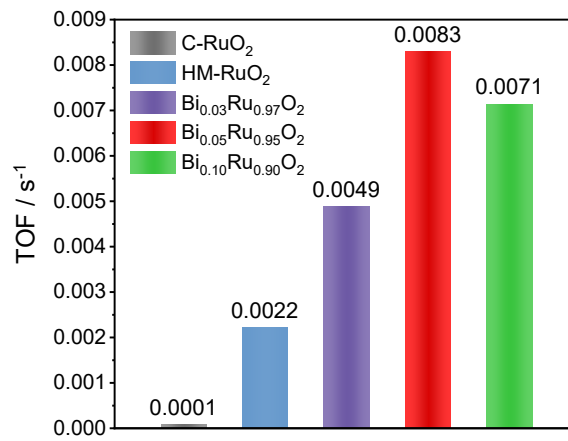

Figure S17 Turnover frequency comparison of Bi<sub>x</sub>Ru<sub>1-x</sub>O<sub>2</sub>, HM-RuO<sub>2</sub> and C-RuO<sub>2</sub>.

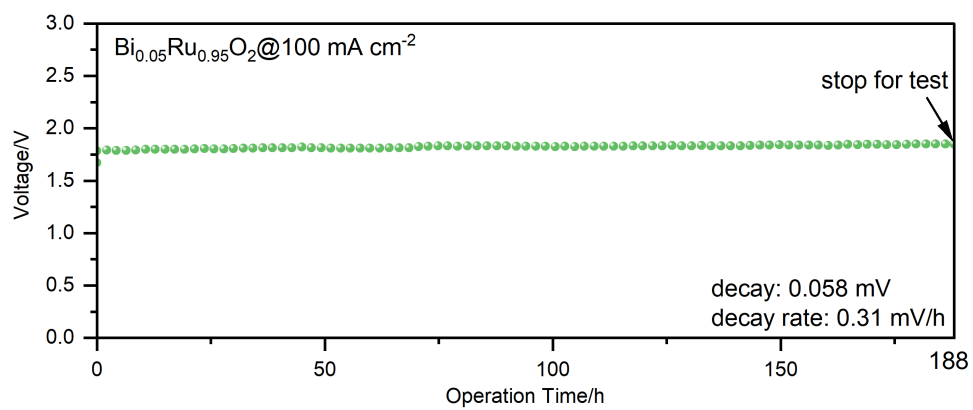

Figure S18 Chronopotentiometry test of Bi<sub>0.05</sub>Ru<sub>0.95</sub>O<sub>2</sub> in 0.5 M H<sub>2</sub>SO<sub>4</sub> electrolyte at 100 mA cm<sup>-2</sup> for 188 h. The electrode after the stability test was used for subsequent tests.

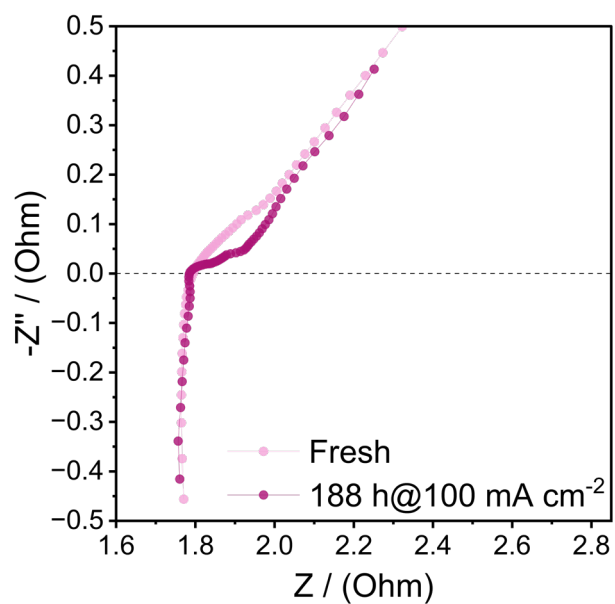

Figure S19 EIS plots of  $\text{Bi}_{0.05}\text{Ru}_{0.95}\text{O}_2$  at a voltage (init E) of 1.24 V in 0.5 M  $\text{H}_2\text{SO}_4$  electrolyte before and after 188-h stability test at  $100\text{mA cm}^{-2}$ . The frequency range for testing is from 100 kHz to 1 Hz.

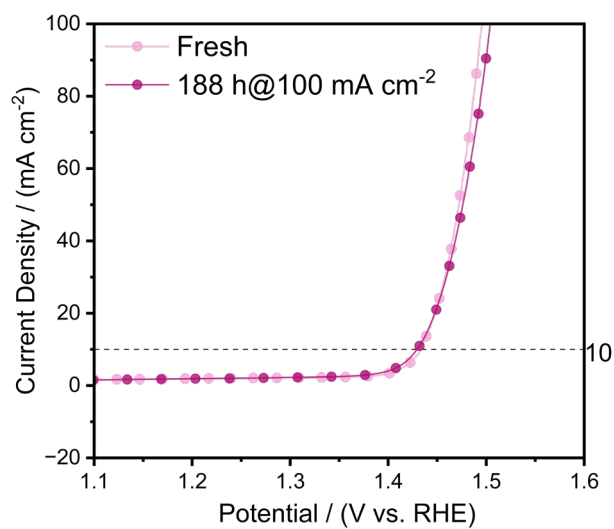

Figure S20 Polarization curves at the scan rate of  $5\text{ mV s}^{-1}$  for  $\text{Bi}_{0.05}\text{Ru}_{0.95}\text{O}_2$  electrode in 0.5 M  $\text{H}_2\text{SO}_4$  electrolyte before and after 188-h stability test at  $100\text{mA cm}^{-2}$ .

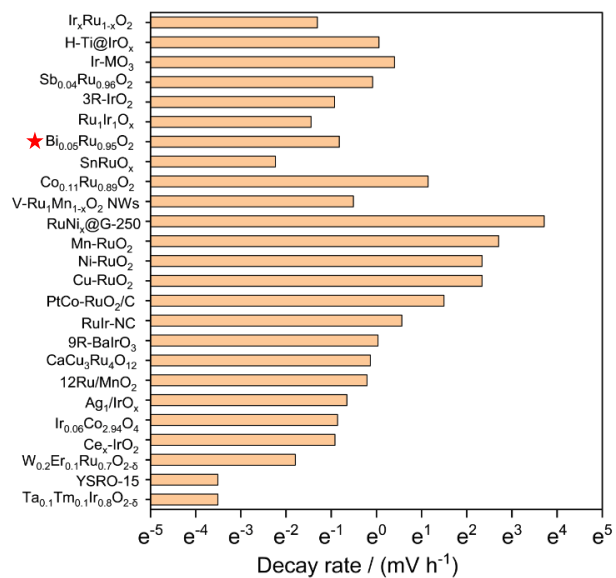

Figure S21 Comparison of decay rate (mV h<sup>-1</sup>) between Bi<sub>0.05</sub>Ru<sub>0.95</sub>O<sub>2</sub>, Sb<sub>0.04</sub>Ru<sub>0.96</sub>O<sub>2</sub> and recently-reported Ru- and Ir-based catalysts.

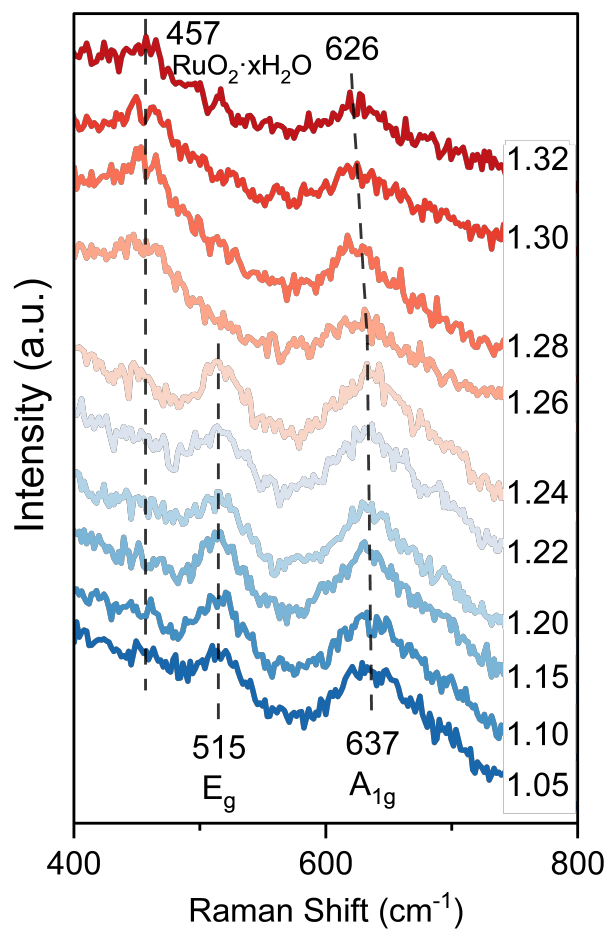

Figure S22. In-situ Raman spectra collected from  $\text{Bi}_{0.05}\text{Ru}_{0.95}\text{O}_2$  catalyst in  $0.1\text{ M HClO}_4$ .



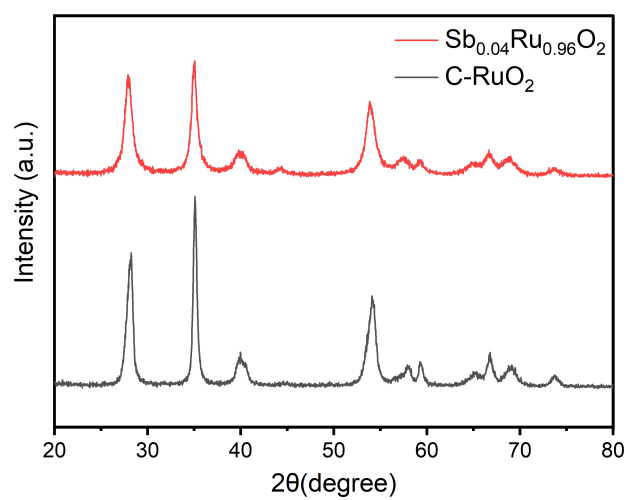

Figure S23 XRD patterns of  $\text{Sb}_{0.04}\text{Ru}_{0.96}\text{O}_2$  and  $\text{C-RuO}_2$ .

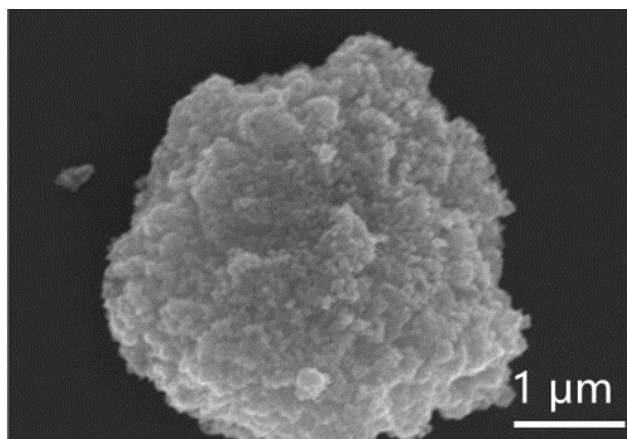

Figure S24 SEM image of  $\text{Sb}_{0.04}\text{Ru}_{0.96}\text{O}_2$ .

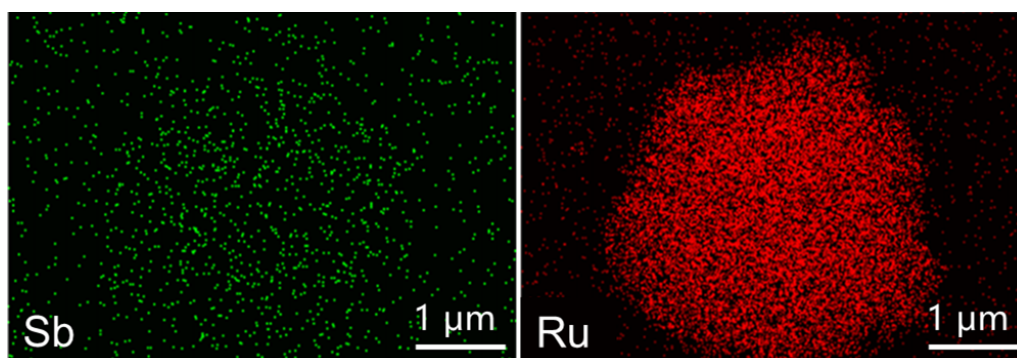

Figure S25 Element mapping of  $\text{Sb}_{0.04}\text{Ru}_{0.96}\text{O}_2$ .

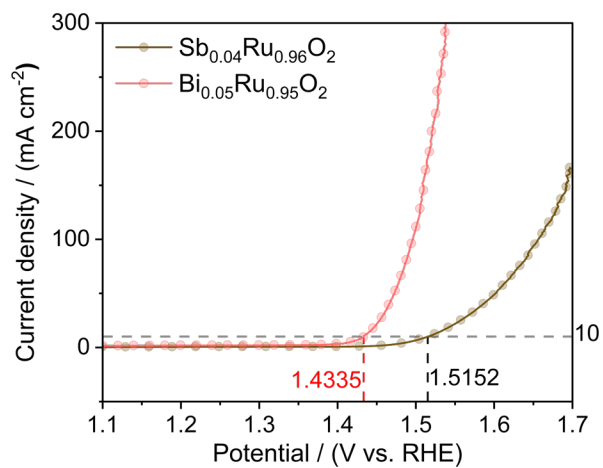

Figure S26 Polarization curves at the scan rate of 5 mV s<sup>-1</sup> for Sb<sub>0.04</sub>Ru<sub>0.96</sub>O<sub>2</sub> and Bi<sub>0.05</sub>Ru<sub>0.95</sub>O<sub>2</sub> electrodes in 0.5 M H<sub>2</sub>SO<sub>4</sub> electrolyte.

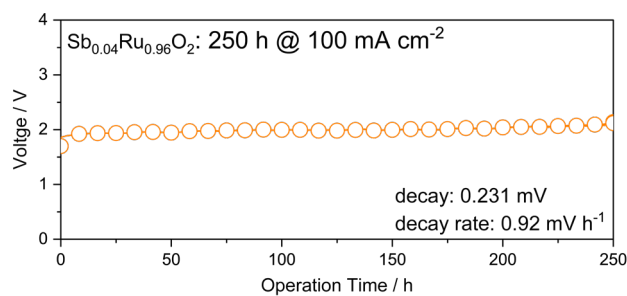

Figure S27 Stability test of Sb<sub>0.04</sub>Ru<sub>0.96</sub>O<sub>2</sub> electrode at the current density of 100 mA cm<sup>-2</sup> in 0.5 M H<sub>2</sub>SO<sub>4</sub>.

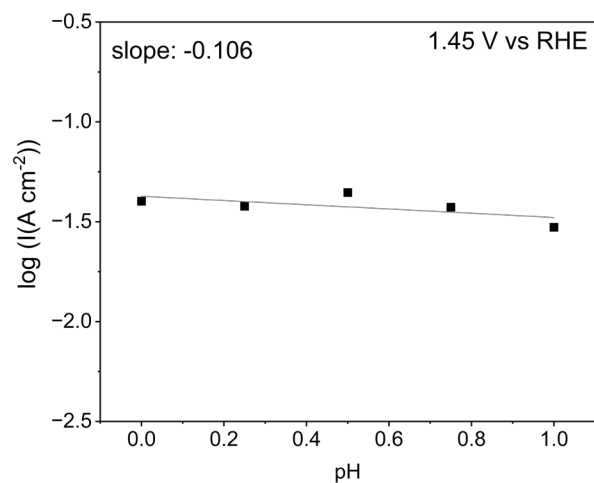

Figure S28 Log ( $I/A\text{ cm}^{-2}$ ) of  $\text{Bi}_{0.05}\text{Ru}_{0.95}\text{O}_2$  electrode at 1.45 V vs. RHE as a function of pH.

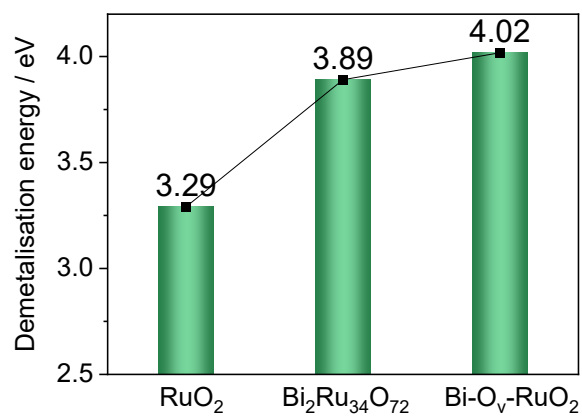

Figure S29 The demetalisation energies of  $\text{RuO}_2$ ,  $\text{Bi}_2\text{Ru}_{34}\text{O}_{72}$  and  $\text{Bi-O}_v\text{-RuO}_2$ .

Table S1 The atomic ratio of Ru and Bi collected from EDS analysis of various  $\text{Bi}_x\text{Ru}_{1-x}\text{O}_2$  samples.

| Sample                                       | Element | Atomic ratio [%] |
|----------------------------------------------|---------|------------------|
| $\text{Bi}_{0.03}\text{Ru}_{0.97}\text{O}_2$ | Bi      | 2.50             |
|                                              | Ru      | 97.50            |
| $\text{Bi}_{0.05}\text{Ru}_{0.95}\text{O}_2$ | Bi      | 4.82             |
|                                              | Ru      | 95.18            |
| $\text{Bi}_{0.10}\text{Ru}_{0.90}\text{O}_2$ | Bi      | 9.90             |
|                                              | Ru      | 90.10            |

Table S2 Fitting results of the O 1s XPS spectra for  $\text{Bi}_{0.05}\text{Ru}_{0.95}\text{O}_2$ , HM-RuO<sub>2</sub> and C-RuO<sub>2</sub> (after carbon-correction).

| Samples                                      | $\text{O}_L$ |               | M-OH         |               | $\text{O}_V$ |               | $\text{O}_{\text{ads}}$ |               |
|----------------------------------------------|--------------|---------------|--------------|---------------|--------------|---------------|-------------------------|---------------|
|                                              | Position /eV | Area (ratio)  | Position /eV | Area (ratio)  | Position /eV | Area (ratio)  | Position /eV            | Area (ratio)  |
| C-RuO <sub>2</sub>                           | 527.48       | 24156 (23.6%) | 528.06       | 38244 (37.4%) | 529.58       | 16210 (15.8%) | 531.01                  | 23742 (23.2%) |
| HM-RuO <sub>2</sub>                          | 527.33       | 17551 (18.4%) | 528.06       | 29686 (31.1%) | 529.58       | 19745 (20.7%) | 530.98                  | 28473 (29.8%) |
| $\text{Bi}_{0.05}\text{Ru}_{0.95}\text{O}_2$ | 527.24       | 27824 (24.4%) | 527.96       | 41922 (36.8%) | 529.58       | 26244 (23.0%) | 531.01                  | 17996 (15.8%) |

Table S3 Overpotential values collected from various  $\text{Bi}_x\text{Ru}_{1-x}\text{O}_2$  electrode at  $10 \text{ mA cm}^{-2}$ .

| Samples                                                | Overpotential/mV |
|--------------------------------------------------------|------------------|
| HM-RuO <sub>2</sub>                                    | 227.8            |
| Bi <sub>0.03</sub> Ru <sub>0.97</sub> O <sub>2</sub>   | 213.2            |
| <b>Bi<sub>0.05</sub>Ru<sub>0.95</sub>O<sub>2</sub></b> | <b>203.5</b>     |
| Bi <sub>0.10</sub> Ru <sub>0.90</sub> O <sub>2</sub>   | 207.8            |
| C-RuO <sub>2</sub>                                     | 403.0            |

Table S4 Comparison of  $C_{dl}$  values and the relative ratio to demonstrate the ECSA changes of various electrocatalysts.

| Catalysts                                              | $C_{dl} / [\text{mF cm}^{-2}]$ | $C_{dl} / C_s$ |
|--------------------------------------------------------|--------------------------------|----------------|
| Bi <sub>0.03</sub> Ru <sub>0.97</sub> O <sub>2</sub>   | 62.98                          | 1.05           |
| <b>Bi<sub>0.05</sub>Ru<sub>0.95</sub>O<sub>2</sub></b> | <b>163.94</b>                  | <b>2.73</b>    |
| Bi <sub>0.10</sub> Ru <sub>0.90</sub> O <sub>2</sub>   | 222.71                         | 3.71           |
| Sb <sub>0.04</sub> Ru <sub>0.96</sub> O <sub>2</sub>   | 186.74                         | 3.11           |
| C-RuO <sub>2</sub>                                     | 5.33                           | 0.09           |
| HM-RuO <sub>2</sub>                                    | 132.60                         | 2.21           |

Table S5 The comparison of Tafel slope, overpotential and durability test performance of Bi<sub>0.05</sub>Ru<sub>0.95</sub>O<sub>2</sub> and HM-RuO<sub>2</sub> with recently reported electrocatalysts in 0.5 M H<sub>2</sub>SO<sub>4</sub>.

| Catalyst                                                             | Tafel slope /<br>(mV dec <sup>-1</sup> ) | Overpotential /<br>(mV) | Reference                                                                            |
|----------------------------------------------------------------------|------------------------------------------|-------------------------|--------------------------------------------------------------------------------------|
| <b>Bi<sub>0.05</sub>Ru<sub>0.95</sub>O<sub>2</sub></b>               | <b>52.90</b>                             | <b>203.5</b>            | <b>This work</b>                                                                     |
| <b>HM-RuO<sub>2</sub></b>                                            | <b>71.64</b>                             | <b>227.8</b>            | <b>This work</b>                                                                     |
| Ru <sub>0.6</sub> Cr <sub>0.2</sub> Ti <sub>0.2</sub> O <sub>2</sub> | 58                                       | 267                     | <i>J Am Chem Soc</i> , 2024, <b>146</b> , 15740-15750 <sup>4</sup>                   |
| Ru <sub>1</sub> Ir <sub>1</sub> O <sub>x</sub>                       | 71.3                                     | 204                     | <i>Advanced Energy Materials</i> , 2021, <b>11</b> , 2102883 <sup>5</sup>            |
| Ru-UiO-bpydc                                                         | 78.3                                     | 200                     | <i>Chem</i> , 2023, <b>9</b> , 1882-1896 <sup>6</sup>                                |
| (Ru, Mn) <sub>2</sub> O <sub>3</sub>                                 | 68.7                                     | 168                     | <i>Nano Energy</i> , 2023, <b>115</b> , 108727 <sup>7</sup>                          |
| SA Zn-RuO <sub>2</sub>                                               | 56                                       | 210                     | <i>Journal of Energy Chemistry</i> , 2024, <b>88</b> , 94-102 <sup>8</sup>           |
| Ru <sub>2</sub> (S <sub>3</sub> Se)                                  | 72                                       | 186                     | <i>Energy &amp; Environmental Science</i> , 2024, <b>17</b> , 1885-1893 <sup>9</sup> |
| CoO <sub>x</sub> /RuO <sub>x</sub> -CC                               | 61.2                                     | 180                     | <i>Small</i> , 2023, <b>19</b> , e2302238 <sup>10</sup>                              |
| 9R-BaIrO <sub>3</sub>                                                | 80                                       | 230                     | <i>J Am Chem Soc</i> , 2021, <b>143</b> , 18001-18009 <sup>11</sup>                  |

Table S6 The comparison of durability test performance of Bi<sub>0.05</sub>Ru<sub>0.95</sub>O<sub>2</sub> and Sb<sub>0.04</sub>Ru<sub>0.96</sub>O<sub>2</sub> with recently reported electrocatalysts in 0.5 M H<sub>2</sub>SO<sub>4</sub>.

| catalyst                                                             | current density / (mA cm <sup>-2</sup> ) | operation time / h | decay rate / (mV h <sup>-1</sup> ) | reference                                                                                   |
|----------------------------------------------------------------------|------------------------------------------|--------------------|------------------------------------|---------------------------------------------------------------------------------------------|
| <b>Bi<sub>0.05</sub>Ru<sub>0.95</sub>O<sub>2</sub></b>               | <b>100</b>                               | <b>&gt;300</b>     | <b>0.44</b>                        | <b>This work</b>                                                                            |
| <b>Sb<sub>0.04</sub>Ru<sub>0.96</sub>O<sub>2</sub></b>               | <b>100</b>                               | <b>250</b>         | <b>0.92</b>                        | <b>This work</b>                                                                            |
| Ru <sub>0.6</sub> Cr <sub>0.2</sub> Ti <sub>0.2</sub> O <sub>2</sub> | 100                                      | 200                | 0.025                              | <i>J Am Chem Soc</i> , 2024, <b>146</b> , 15740-15750 <sup>4</sup>                          |
| Ru <sub>1</sub> Ir <sub>1</sub> O <sub>x</sub>                       | 100                                      | 110                | 0.236                              | <i>Advanced Energy Materials</i> , 2021, <b>11</b> , 2102883 <sup>5</sup>                   |
| Ru-UiO-bpydc                                                         | 50                                       | 140                | 0.894                              | <i>Chem</i> , 2023, <b>9</b> , 1882-1896. <sup>6</sup>                                      |
| (Ru, Mn) <sub>2</sub> O <sub>3</sub>                                 | 10                                       | 40                 | 5.06                               | <i>Nano Energy</i> , 2023, <b>115</b> , 108727 <sup>7</sup>                                 |
| SA Zn-RuO <sub>2</sub>                                               | 10                                       | 43                 | 4.32                               | <i>Journal of Energy Chemistry</i> , 2024, <b>88</b> , 94-102 <sup>8</sup>                  |
| Ru <sub>2</sub> (S <sub>3</sub> Se)                                  | 10                                       | 50                 | Stable                             | <i>Energy &amp; Environmental Science</i> , 2024, <b>17</b> , 1885-1893 <sup>9</sup>        |
| CoO <sub>x</sub> /RuO <sub>x</sub> -CC                               | 10                                       | 60                 | 0.786                              | <i>Small</i> , 2023, <b>19</b> , e2302238 <sup>10</sup>                                     |
| 9R-BaIrO <sub>3</sub>                                                | 10                                       | 48                 | 1.04                               | <i>J Am Chem Soc</i> , 2021, <b>143</b> , 18001-18009 <sup>11</sup>                         |
| SnRuO <sub>x</sub>                                                   | 100                                      | 250                | 0.107                              | <i>Nat Commun</i> , 2023, <b>14</b> , 843 <sup>12</sup>                                     |
| 3R-IrO <sub>2</sub>                                                  | 100                                      | 42                 | 0.396                              | <i>Joule</i> , 2021, <b>5</b> , 3221-3234 <sup>13</sup>                                     |
| Ir-MoO <sub>3</sub>                                                  | 100                                      | 48                 | 1.496                              | <i>Nat Commun</i> , 2021, <b>12</b> , 5676 <sup>14</sup>                                    |
| V-Ru <sub>x</sub> Mn <sub>1-x</sub> O <sub>2</sub> NWs               | 50                                       | 101                | 0.6                                | <i>Journal of Materials Chemistry A</i> , 2023, <b>11</b> , 25252-25261 <sup>15</sup>       |
| Sm <sub>3</sub> IrO <sub>7</sub>                                     | 10                                       | 10                 | 24.02                              | <i>ACS Applied Materials &amp; Interfaces</i> , 2023, <b>15</b> , 14282-14290 <sup>16</sup> |
| MD-RuO <sub>2</sub> -BN                                              | 10                                       | 24                 | 1.2                                | <i>Nat Commun</i> , 2024, <b>15</b> , 3928 <sup>17</sup>                                    |
| RuIr-NC                                                              | 10                                       | 40                 | 1.759                              | <i>Nat Commun</i> , 2021, <b>12</b> , 1145 <sup>18</sup>                                    |



|                                              |    |     |        |                                                                                                          |
|----------------------------------------------|----|-----|--------|----------------------------------------------------------------------------------------------------------|
| $\text{Nd}_{0.1}\text{RuO}_x/\text{CC}$      | 10 | 25  | 0.6    | <i>Advanced Functional Materials</i> ,<br>2023, <b>33</b> , DOI:<br>10.1002/adfm.202213304 <sup>19</sup> |
| $\text{Y}_2\text{MnRuO}_7$                   | 10 | 40  | 0.3    | <i>Nat Commun</i> , 2023, <b>14</b> , 2010 <sup>20</sup>                                                 |
| $\text{Li}_{0.52}\text{RuO}_2$               | 10 | 70  | 1.694  | <i>Nat Commun</i> , 2022, <b>13</b> , 3784 <sup>21</sup>                                                 |
| $\text{RuCoO}_x$                             | 10 | 100 | 0.45   | <i>J Am Chem Soc</i> , 2023, <b>145</b> , 17995-<br>18006 <sup>22</sup>                                  |
| $\text{Mn-RuO}_2\text{-450}$                 | 10 | 150 | 0.267  | <i>Small</i> , 2024, <b>20</b> , e2400754 <sup>23</sup>                                                  |
| $\text{RuO}_{2-x}/\text{RuSe}_2$             | 10 | 200 | Stable | <i>Advanced Functional Materials</i> ,<br>2024, DOI:<br>10.1002/adfm.202406587 <sup>24</sup>             |
| $12\text{Ru}/\text{MnO}_2$                   | 10 | 200 | 0.815  | <i>Nature Catalysis</i> , 2021, <b>4</b> , 1012-<br>1023 <sup>25</sup>                                   |
| $\text{PtCo-RuO}_2/\text{C}$                 | 10 | 20  | 4.47   | <i>Energy &amp; Environmental Science</i> ,<br>2022, <b>15</b> , 1119-1130 <sup>26</sup>                 |
| $\text{Ag}_1/\text{IrO}_x$                   | 10 | 50  | 0.52   | <i>ACS Energy Letters</i> , 2021, DOI:<br>10.1021/acsenergylett.1c00283,<br>1588-1595 <sup>27</sup>      |
| $\text{Ni-RuO}_2$                            | 10 | 8   | 10.4   | <i>Nat Mater</i> , 2023, <b>22</b> , 100-108 <sup>28</sup>                                               |
| $\text{Ir}_{0.06}\text{Co}_{2.94}\text{O}_4$ | 10 | 200 | 0.424  | <i>J Am Chem Soc</i> , 2021, <b>143</b> , 5201-<br>5211 <sup>29</sup>                                    |

Table S7 The atomic ratio of Ru and Sb collected from EDS analysis of  $\text{Sb}_{0.04}\text{Ru}_{0.96}\text{O}_2$  sample.

| Sample                                       | Element | Atomic ratio [%] |
|----------------------------------------------|---------|------------------|
| $\text{Sb}_{0.04}\text{Ru}_{0.96}\text{O}_2$ | Sb      | 4.14             |
|                                              | Ru      | 95.86            |

Table S8 Relative Gibbs free energy of intermediates for AEM and LOM of  $\text{Bi}_2\text{Ru}_{34}\text{O}_{72}$ ,  $\text{Bi-O}_v\text{-RuO}_2$  and  $\text{RuO}_2$ .

| AEM                   |                |                                          |                              |
|-----------------------|----------------|------------------------------------------|------------------------------|
| Model \ Intermediates | $\text{RuO}_2$ | $\text{Bi}_2\text{Ru}_{34}\text{O}_{72}$ | $\text{Bi-O}_v\text{-RuO}_2$ |
| Slab                  | 0              | 0                                        | 0                            |
| *OH                   | 1.35           | 0.88                                     | 0.66                         |
| *O                    | 2.21           | 2.42                                     | 2.21                         |
| *OOH                  | 4.23           | 4.05                                     | 3.63                         |
| Slab+ $\text{O}_2$    | 4.92           | 4.92                                     | 4.92                         |

| LOM                   |                |                                          |                              |
|-----------------------|----------------|------------------------------------------|------------------------------|
| Model \ Intermediates | $\text{RuO}_2$ | $\text{Bi}_2\text{Ru}_{34}\text{O}_{72}$ | $\text{Bi-O}_v\text{-RuO}_2$ |
| Slab                  | 0              | 0                                        | 0                            |
| *OH                   | 1.35           | 0.88                                     | 0.66                         |
| *O                    | 2.21           | 2.42                                     | 2.21                         |
| *H                    | 5.66           | 5.28                                     | 4.69                         |
| Slab+ $\text{O}_2$    | 4.92           | 4.92                                     | 4.92                         |

## References

1. J. Rossmeisl, A. Logadottir and J. K. Nørskov, *Chemical Physics*, 2005, **319**, 178-184.
2. I. C. Man, H. Y. Su, F. Calle - Vallejo, H. A. Hansen, J. I. Martínez, N. G. Inoglu, J. Kitchin, T. F. Jaramillo, J. K. Nørskov and J. Rossmeisl, *ChemCatChem*, 2011, **3**, 1159-1165.
3. S. Liu, Y. Chang, N. He, S. Zhu, L. Wang and X. Liu, *ACS Appl Mater Interfaces*, 2023, **15**, 20563-20570.
4. J. Abed, J. Heras-Domingo, R. Y. Sanspeur, M. Luo, W. Alnoush, D. M. Meira, H. Wang, J. Wang, J. Zhou, D. Zhou, K. Fatih, J. R. Kitchin, D. Higgins, Z. W. Ulissi and E. H. Sargent, *J Am Chem Soc*, 2024, **146**, 15740-15750.
5. J. He, X. Zhou, P. Xu and J. Sun, *Advanced Energy Materials*, 2021, **11**, 2102883.
6. N. Yao, H. Jia, J. Zhu, Z. Shi, H. Cong, J. Ge and W. Luo, *Chem*, 2023, **9**, 1882-1896.
7. Y. Qin, B. Cao, X.-Y. Zhou, Z. Xiao, H. Zhou, Z. Zhao, Y. Weng, J. Lv, Y. Liu, Y.-B. He, F. Kang, K. Li and T.-Y. Zhang, *Nano Energy*, 2023, **115**, 108727.
8. Q. Qin, T. Wang, Z. Li, G. Zhang, H. Jang, L. Hou, Y. Wang, M. Gyu Kim, S. Liu and X. Liu, *Journal of Energy Chemistry*, 2024, **88**, 94-102.
9. D. Chen, H. Zhao, R. Yu, K. Yu, J. Zhu, J. Jiao, X. Mu, J. Yu, J. Wu and S. Mu, *Energy & Environmental Science*, 2024, **17**, 1885-1893.
10. L. Deng, S. Liu, D. Liu, Y. M. Chang, L. Li, C. Li, Y. Sun, F. Hu, H. Y. Chen, H. Pan and S. Peng, *Small*, 2023, **19**, e2302238.
11. N. Li, L. Cai, C. Wang, Y. Lin, J. Huang, H. Sheng, H. Pan, W. Zhang, Q. Ji, H. Duan, W. Hu, W. Zhang, F. Hu, H. Tan, Z. Sun, B. Song, S. Jin and W. Yan, *J Am Chem Soc*, 2021, **143**, 18001-18009.
12. Z. Shi, J. Li, Y. Wang, S. Liu, J. Zhu, J. Yang, X. Wang, J. Ni, Z. Jiang, L. Zhang, Y. Wang, C. Liu, W. Xing and J. Ge, *Nat Commun*, 2023, **14**, 843.
13. Z. Fan, Y. Ji, Q. Shao, S. Geng, W. Zhu, Y. Liu, F. Liao, Z. Hu, Y.-C. Chang, C.-W. Pao, Y. Li, Z. Kang and M. Shao, *Joule*, 2021, **5**, 3221-3234.
14. X. Liu, S. Xi, H. Kim, A. Kumar, J. Lee, J. Wang, N. Q. Tran, T. Yang, X. Shao, M. Liang, M. G. Kim and H. Lee, *Nat Commun*, 2021, **12**, 5676.
15. H. Zhu, Y. Wang, Z. Jiang, B. Deng and Z.-J. Jiang, *Journal of Materials Chemistry A*, 2023, **11**, 25252-25261.
16. Y. Wang, Z. Li, L. Hou, Y. Wang, L. Zhang, T. Wang, H. Liu, S. Liu, Q. Qin and X. Liu, *ACS Applied Materials & Interfaces*, 2023, **15**, 14282-14290.

17. D. Chen, R. Yu, K. Yu, R. Lu, H. Zhao, J. Jiao, Y. Yao, J. Zhu, J. Wu and S. Mu, *Nat Commun*, 2024, **15**, 3928.
18. D. Wu, K. Kusada, S. Yoshioka, T. Yamamoto, T. Toriyama, S. Matsumura, Y. Chen, O. Seo, J. Kim, C. Song, S. Hiroi, O. Sakata, T. Ina, S. Kawaguchi, Y. Kubota, H. Kobayashi and H. Kitagawa, *Nat Commun*, 2021, **12**, 1145.
19. L. Li, G. Zhang, J. Xu, H. He, B. Wang, Z. Yang and S. Yang, *Advanced Functional Materials*, 2023, **33**.
20. D. Galyamin, J. Torrero, I. Rodriguez, M. J. Kolb, P. Ferrer, L. Pascual, M. A. Salam, D. Gianolio, V. Celorrio, M. Mokhtar, D. Garcia Sanchez, A. S. Gago, K. A. Friedrich, M. A. Pena, J. A. Alonso, F. Calle-Vallejo, M. Retuerto and S. Rojas, *Nat Commun*, 2023, **14**, 2010.
21. Y. Qin, T. Yu, S. Deng, X. Y. Zhou, D. Lin, Q. Zhang, Z. Jin, D. Zhang, Y. B. He, H. J. Qiu, L. He, F. Kang, K. Li and T. Y. Zhang, *Nat Commun*, 2022, **13**, 3784.
22. W. Zhu, F. Yao, K. Cheng, M. Zhao, C. J. Yang, C. L. Dong, Q. Hong, Q. Jiang, Z. Wang and H. Liang, *J Am Chem Soc*, 2023, **145**, 17995-18006.
23. M. Xiao, J. Liu, R. Li, Y. Sun, F. Liu, J. Gan and S. Gao, *Small*, 2024, **20**, e2400754.
24. Y. Chen, Y. Liu, L. Li, T. Sakthive, Z. Guo and Z. Dai, *Advanced Functional Materials*, 2024, DOI: 10.1002/adfm.202406587.
25. C. Lin, J.-L. Li, X. Li, S. Yang, W. Luo, Y. Zhang, S.-H. Kim, D.-H. Kim, S. S. Shinde, Y.-F. Li, Z.-P. Liu, Z. Jiang and J.-H. Lee, *Nature Catalysis*, 2021, **4**, 1012-1023.
26. H. Jin, S. Choi, G. J. Bang, T. Kwon, H. S. Kim, S. J. Lee, Y. Hong, D. W. Lee, H. S. Park, H. Baik, Y. Jung, S. J. Yoo and K. Lee, *Energy & Environmental Science*, 2022, **15**, 1119-1130.
27. F.-F. Zhang, C.-Q. Cheng, J.-Q. Wang, L. Shang, Y. Feng, Y. Zhang, J. Mao, Q.-J. Guo, Y.-M. Xie, C.-K. Dong, Y.-H. Cheng, H. Liu and X.-W. Du, *ACS Energy Letters*, 2021, DOI: 10.1021/acseenergylett.1c00283, 1588-1595.
28. Z. Y. Wu, F. Y. Chen, B. Li, S. W. Yu, Y. Z. Finfrock, D. M. Meira, Q. Q. Yan, P. Zhu, M. X. Chen, T. W. Song, Z. Yin, H. W. Liang, S. Zhang, G. Wang and H. Wang, *Nat Mater*, 2023, **22**, 100-108.
29. J. Shan, C. Ye, S. Chen, T. Sun, Y. Jiao, L. Liu, C. Zhu, L. Song, Y. Han, M. Jaroniec, Y. Zhu, Y. Zheng and S. Z. Qiao, *J Am Chem Soc*, 2021, **143**, 5201-5211.
